# Supplementary material for: Down-Regulated Drebrin Aggravates Cognitive Impairments in a Mouse Model of Alzheimer’s Disease
Source: PubMed Central journal article supplement (PMC5412384; doi:10.3390/ijms18040800), 2017-04-11
Supplement: ijms-18-00800-s001.pdf [file ijms-18-00800-s001.pdf]

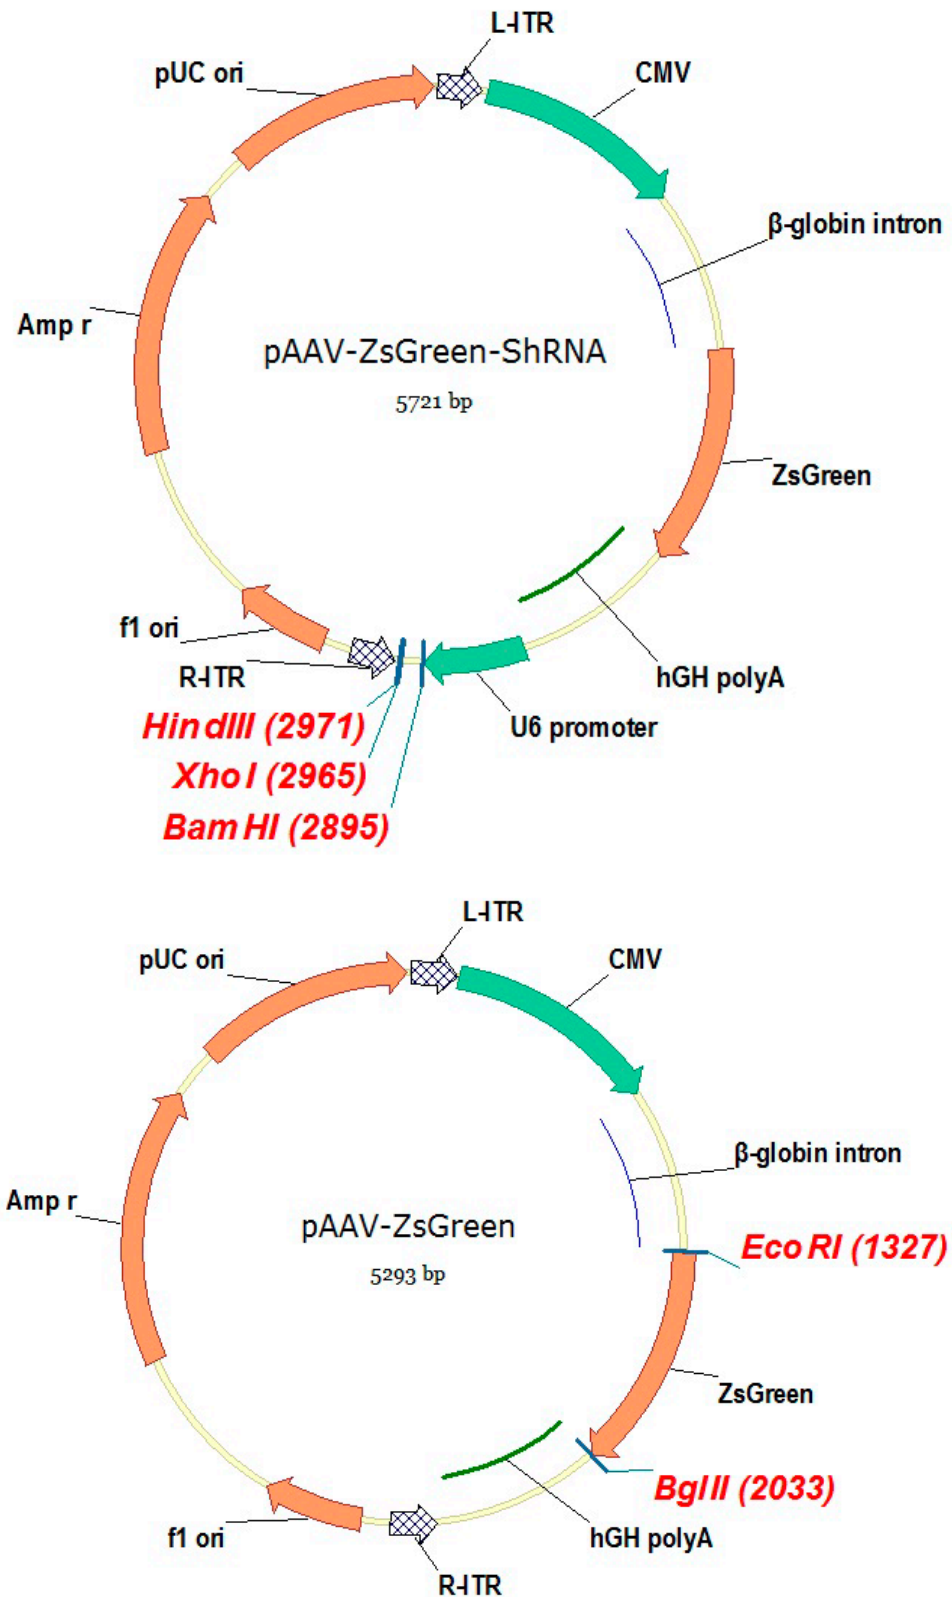

**Figure S1.** Basic structure of pAAV-ShRNA plasmid contains enzyme identification and Control plasmid.
